# Supplementary material
Source: Springer Nature journal article supplement (https://www.springermedizin.de/resource/supplementary/12990_2013_721_MOESM1_ESM.pdf/9612256)

**A**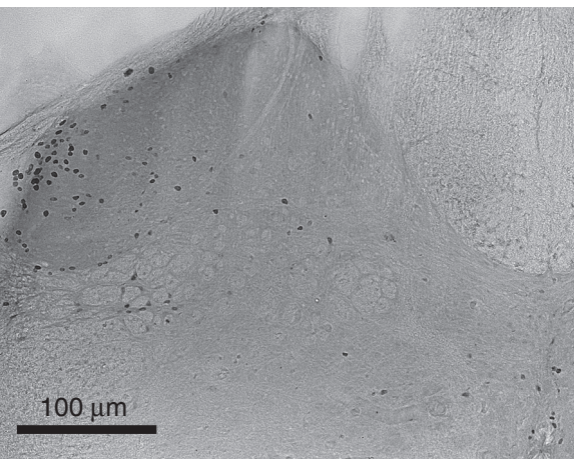**B**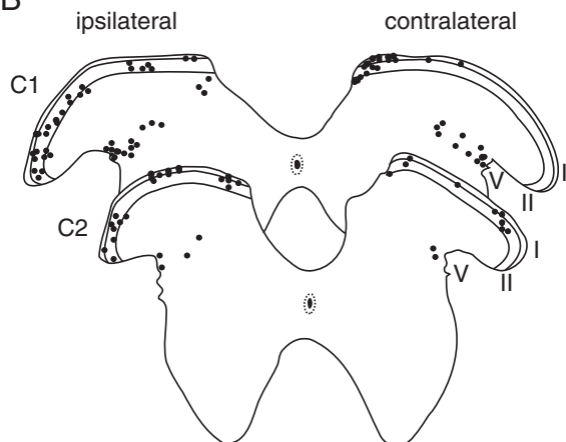**C**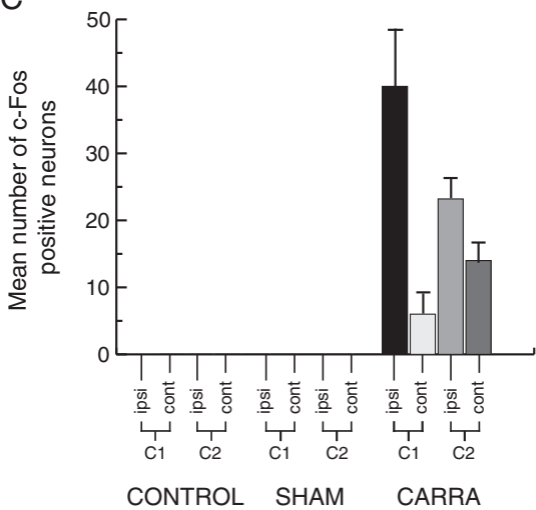

Supplement: MOESM1 [file 9612256]
